# Supplementary material for: Functional validation of somatic variability in TP53 and KRAS for prediction of platinum sensitivity and prognosis in epithelial ovarian carcinoma patients
Source: Research Square preprint supplement (doi:10.21203/rs.3.rs-5224537/v1), 2024-10-22
Supplement: Supplementary file 1 [file a8a048bcfb9491bea0e1f9c5.pdf]

## Supplementary materials

### Functional validation of somatic variability in *TP53* and *KRAS* for prediction of platinum sensitivity and prognosis in epithelial ovarian carcinoma patients

Mohammad Al Obeed Allah<sup>1</sup>, Esraa Alli<sup>1</sup>, Ivona Krus<sup>2</sup>, Petr Holý<sup>1,2</sup>, Vojtěch Haničinec<sup>1</sup>, Filip Ambrozkiwicz<sup>1</sup>, Lukáš Rob<sup>3</sup>, Martin Hruda<sup>3</sup>, Marcela Mrhalová<sup>4</sup>, Kateřina Kopečková<sup>5</sup>, Alena Bartáková<sup>6</sup>, Jiří Bouda<sup>6</sup>, Pavel Souček<sup>1,2</sup>, and Radka Václavíková<sup>1,2\*</sup>

<sup>1</sup>Biomedical Center, Faculty of Medicine in Pilsen, Charles University, Pilsen, Czech Republic;

<sup>2</sup>Toxicogenomics Unit, National Institute of Public Health, Prague, Czech Republic;

<sup>3</sup>Department of Gynecology and Obstetrics, Third Faculty of Medicine, Charles University and University Hospital Královské Vinohrady, Prague, Czech Republic;

<sup>4</sup>Department of Pathology and Molecular Medicine, Second Faculty of Medicine, Charles University and Motol University Hospital, Prague, Czech Republic;

<sup>5</sup>Department of Oncology and Molecular Medicine, Second Faculty of Medicine, Charles University and Motol University Hospital, Prague, Czech Republic;

<sup>6</sup>Department of Gynecology and Obstetrics, Faculty of Medicine and University Hospital in Pilsen, Charles University, Pilsen, Czech Republic.

\*Correspondence: Radka Václavíková, Biomedical Center, Faculty of Medicine in Pilsen, Charles University, Pilsen 306 05, Czech Republic; email: radka.vaclavikova@lfp.cuni.cz, phone: +420 267 082 711; ORCID: 0000-0002-0451-4725

## List of supplementary materials

**Figure S1:** Associations between stage (A), residuum after surgery (B), and chemosensitivity status (C) and overall survival of EOC patients

**Figure S2:** Representative chromatograms of *KRAS* mutations assessed in EOC patients by direct Sanger sequencing

A – codon 12 in exon 2, B – codon 61 in exon 3

**Figure S3:** Representative chromatograms of *TP53* mutations assessed in EOC patients by direct Sanger sequencing

A – p.Arg175His, B – p.His179Gln, C – p.His214Arg, D – p.Tyr220Cys, E – p.Glu198Ter, F – p.Arg213Ter, G – p.Asp259Tyr, H – p.Arg273His, I – p.Arg282Trp, J – p.Arg248His/Trp.

**Figure S4:** Differences in *TP53* transcript levels between patients divided by functional classifications of *TP53* mutations

Gain-of-function vs. loss-of-function (A), non-functional vs. functional transactivation (B), and DNA binding loop affecting vs. other (C)

**Figure S5:** Association between subtype and platinum-free (A) and overall (B) survival of EOC patients

**Figure S6:** Association between *TP53* mutation status and platinum-free interval of nonHGSC EOC patients

**Table S1:** List of primers used for *KRAS* and *TP53* mutation analysis in EOC patients by direct Sanger sequencing

**Table S2:** Associations between EOC subtype and disease stage

**Figure S1:** Associations between stage (A), residuum after surgery (B), and chemosensitivity status (C) and overall survival of EOC patients

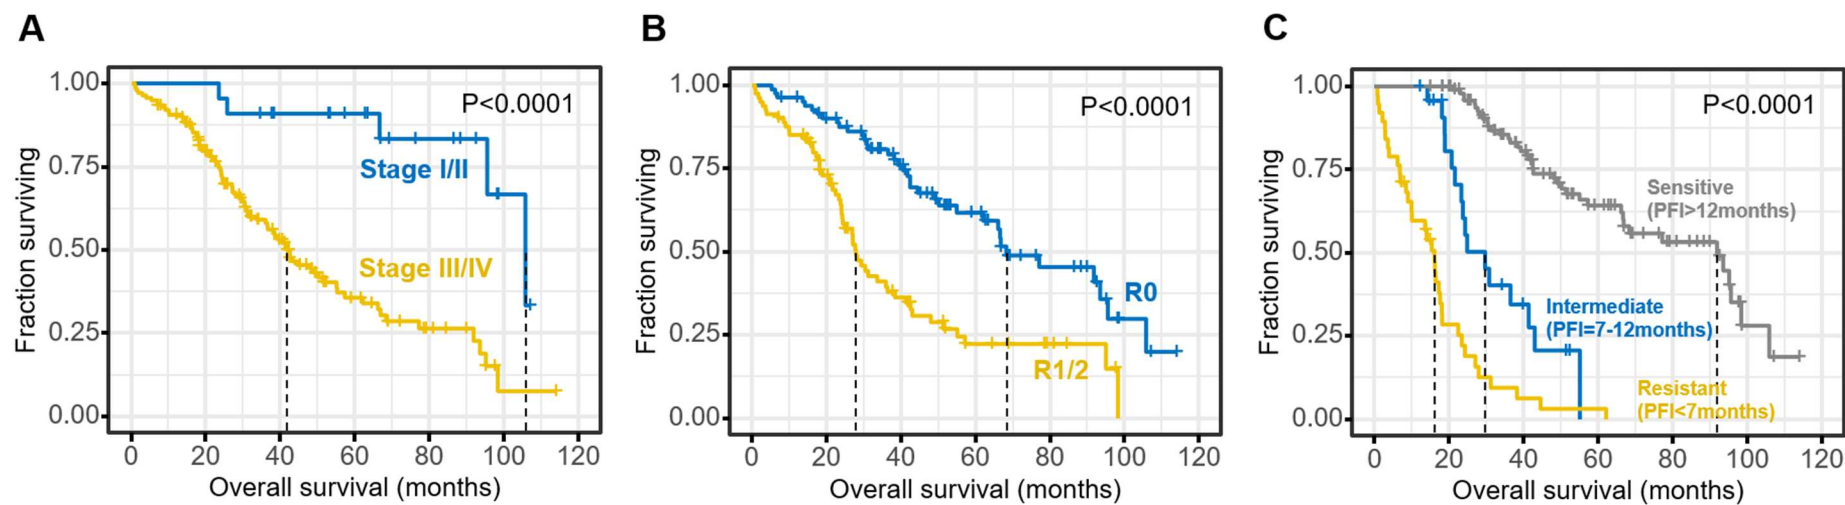

**Figure S2:** Representative chromatograms of *KRAS* mutations assessed in EOC patients by direct Sanger sequencing

A – codon 12 in exon 2, B – codon 61 in exon 3

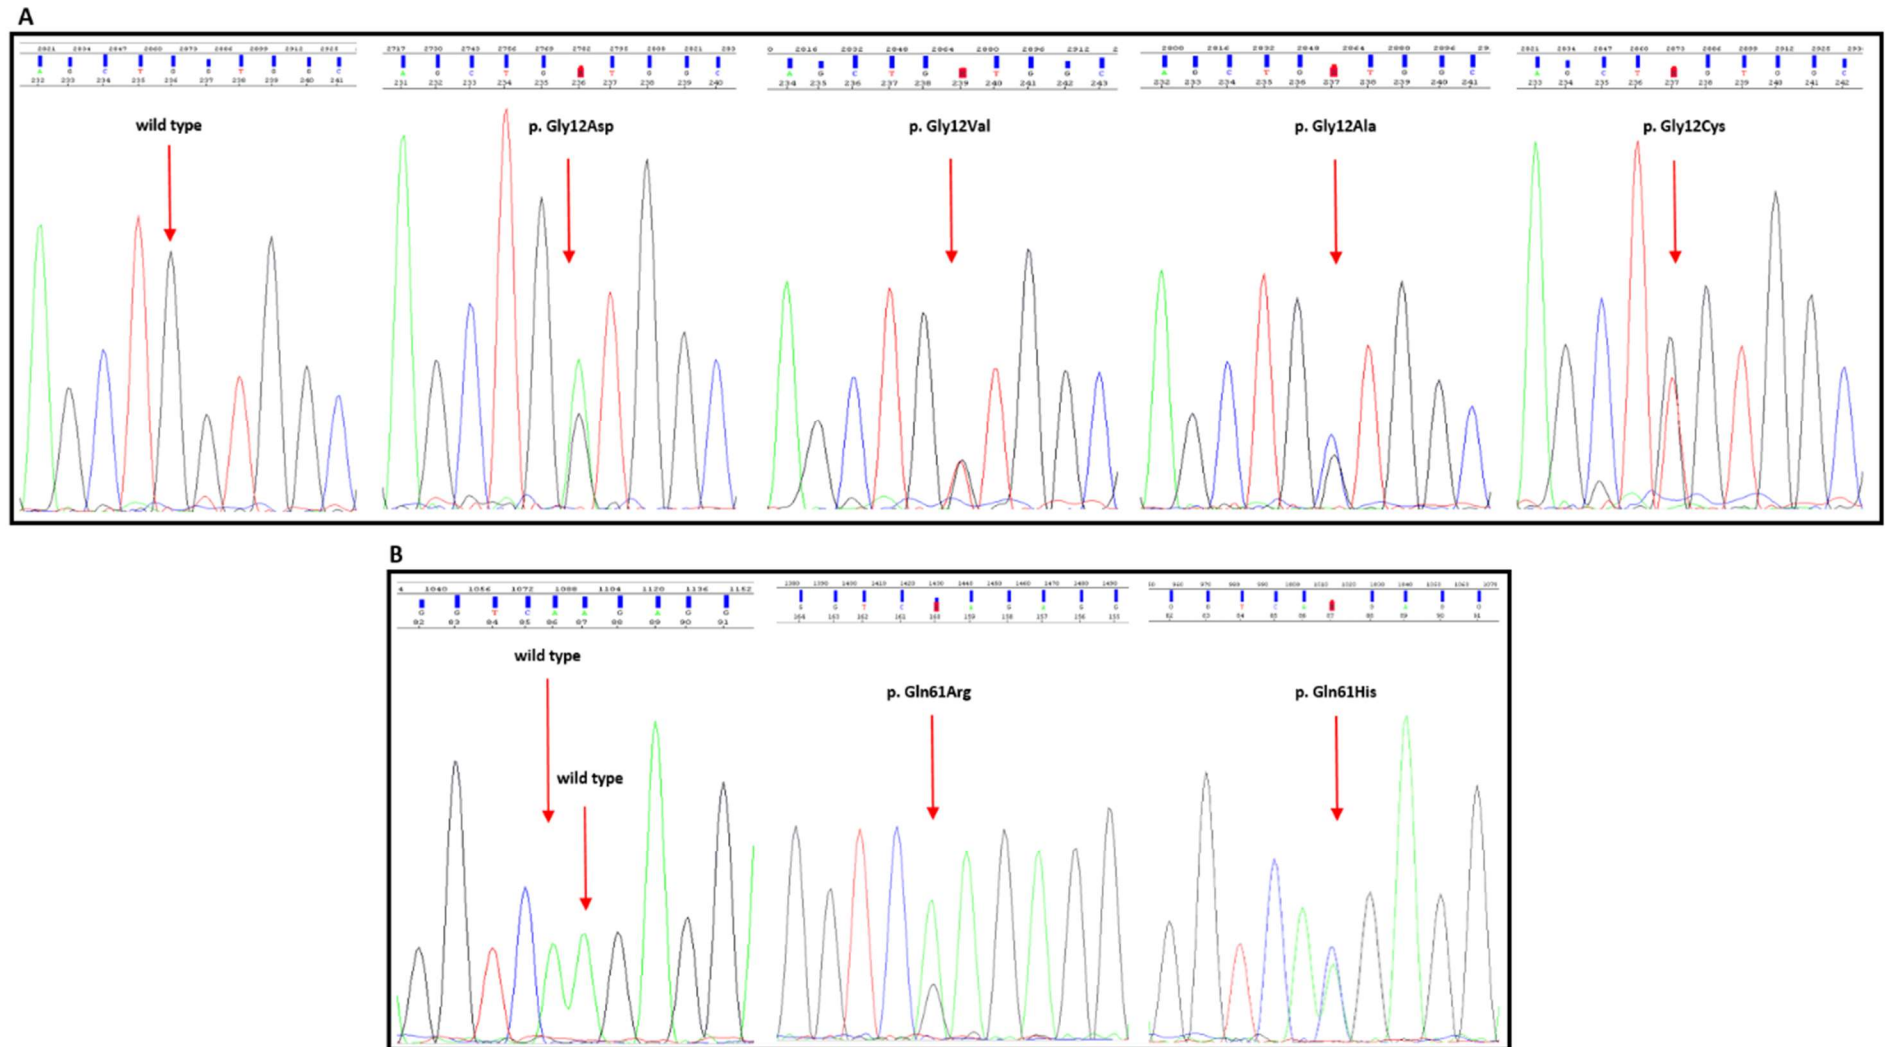

**Figure S3:** Representative chromatograms of *TP53* mutations assessed in EOC patients by direct Sanger sequencing

A – p.Arg175His, B – p.His179Gln, C – p.His214Arg, D – p.Tyr220Cys, E – p.Glu198Ter, F – p.Arg213Ter, G – p.Asp259Tyr, H – p.Arg273His, I – p.Arg282Trp, J – p.Arg248His/Trp.

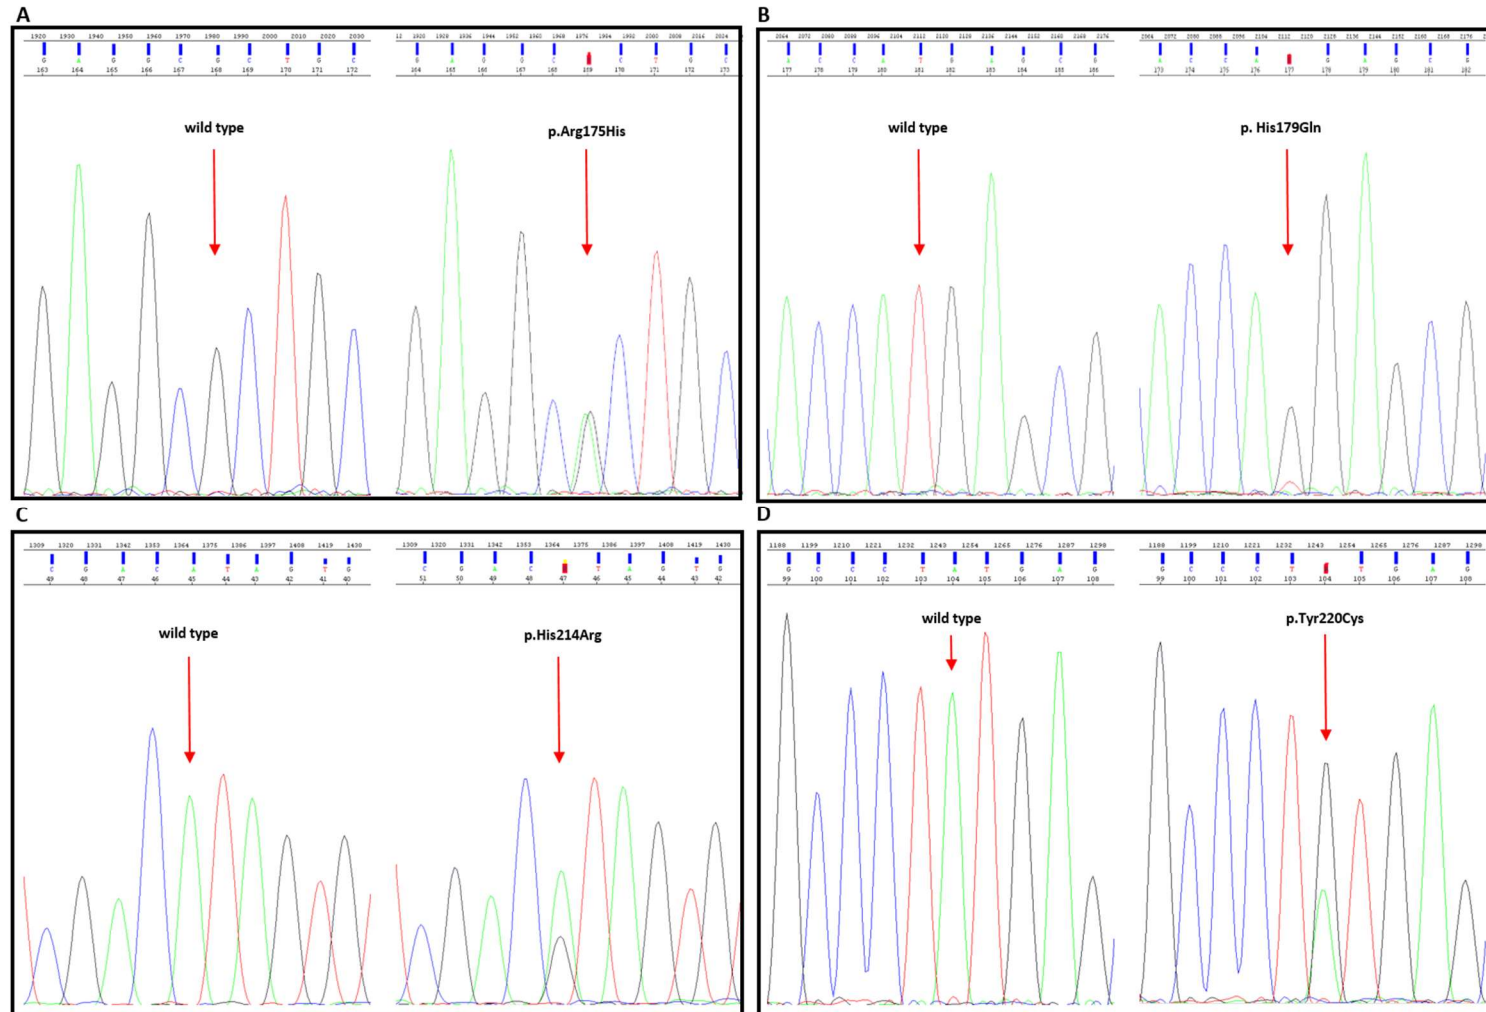

E

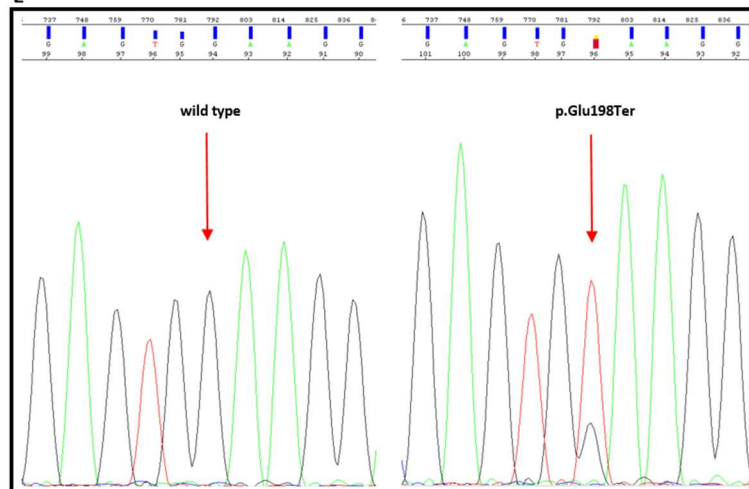

F

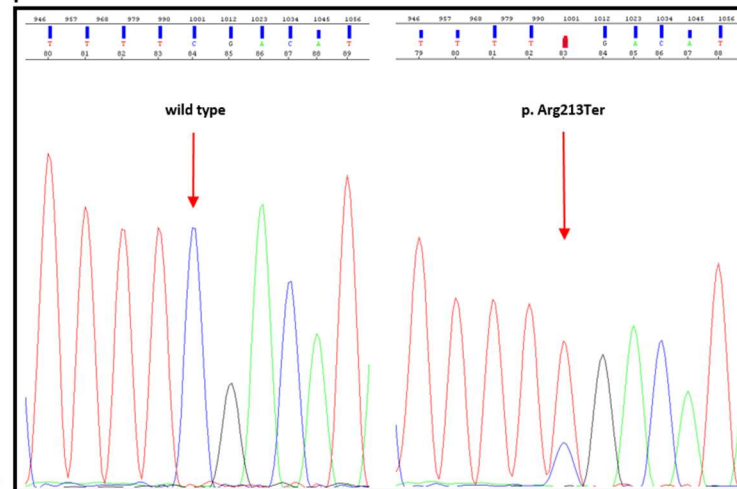

G

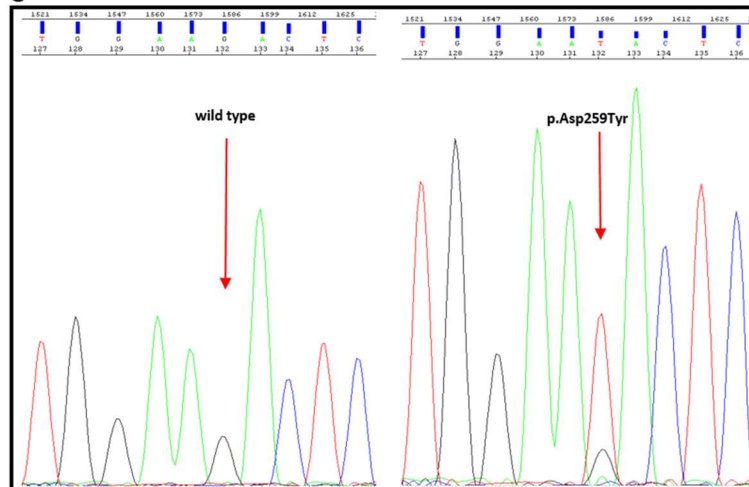

H

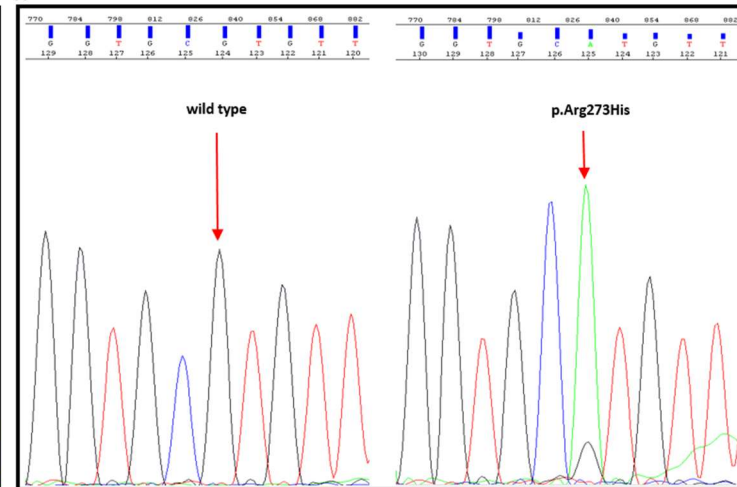

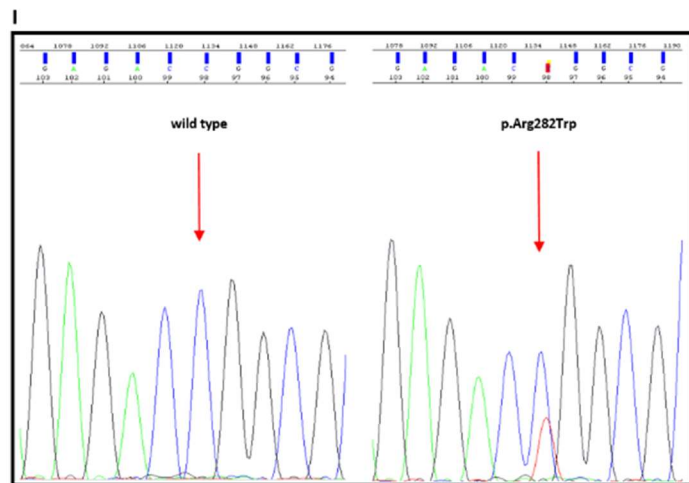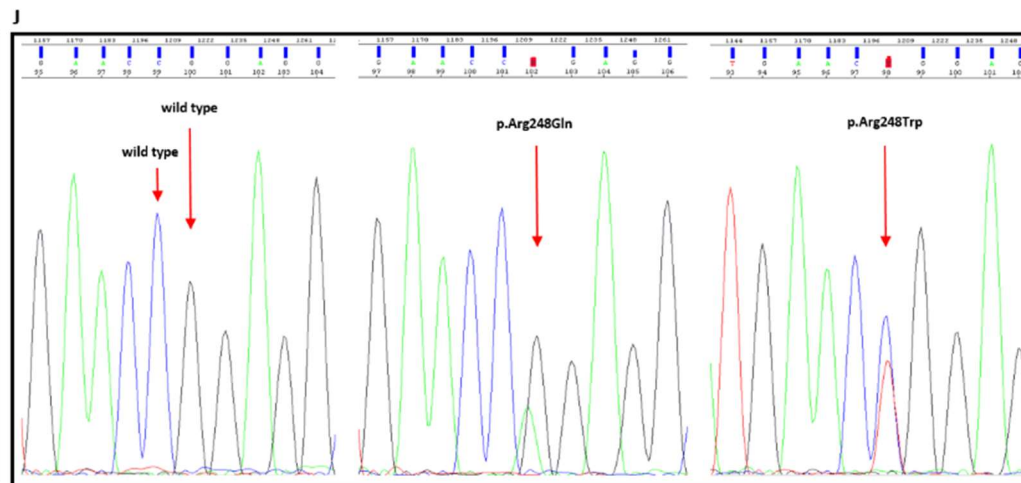

**Figure S4:** Differences in TP53 transcript levels between patients divided by functional classifications of *TP53* mutations  
Gain-of-function vs. loss-of-function (A), non-functional vs. functional transactivation (B), and DNA binding loop affecting vs. other (C)

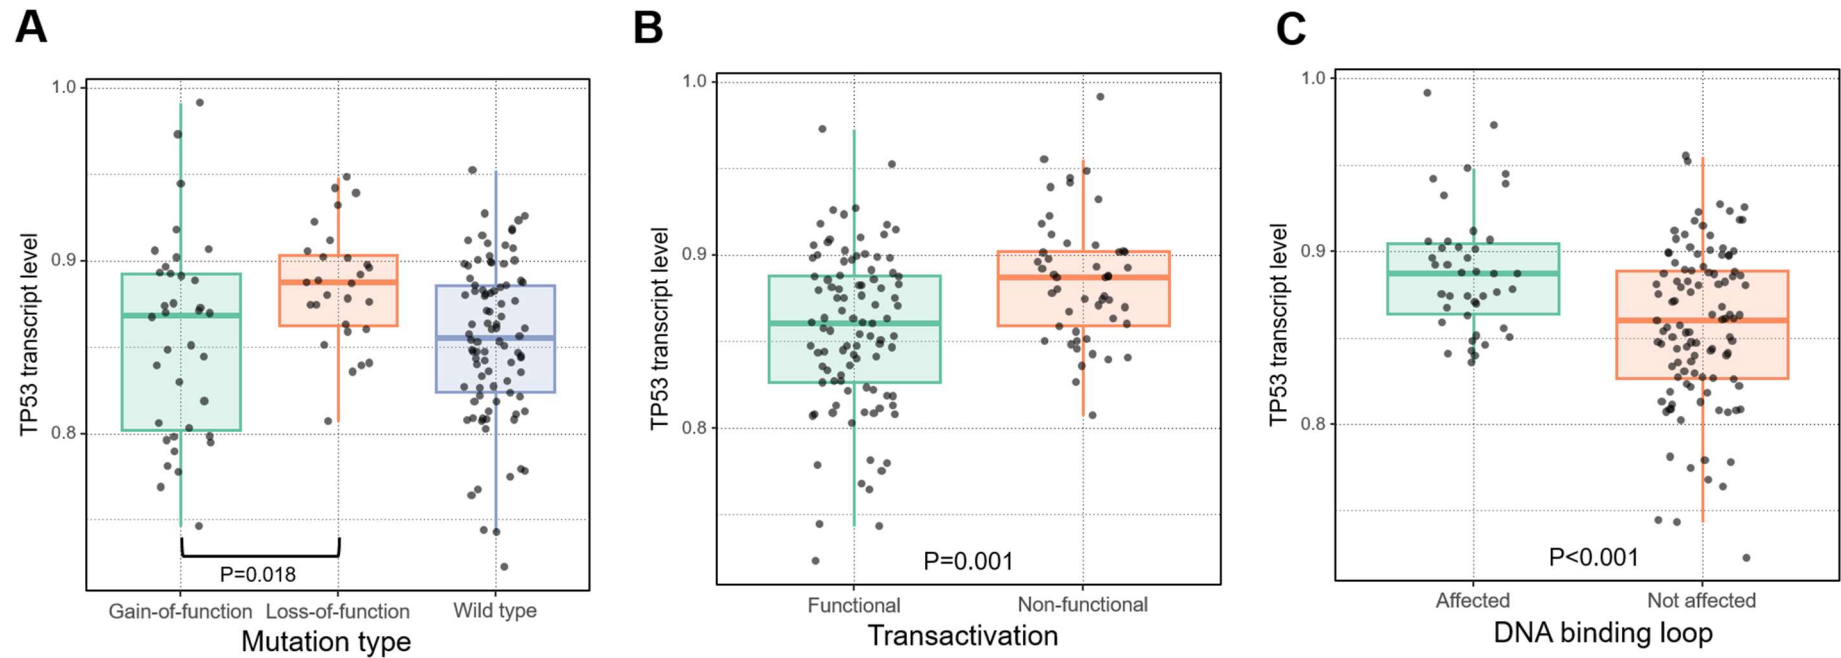



**Figure S5:** Association between subtype and platinum-free (A) and overall (B) survival of EOC patients

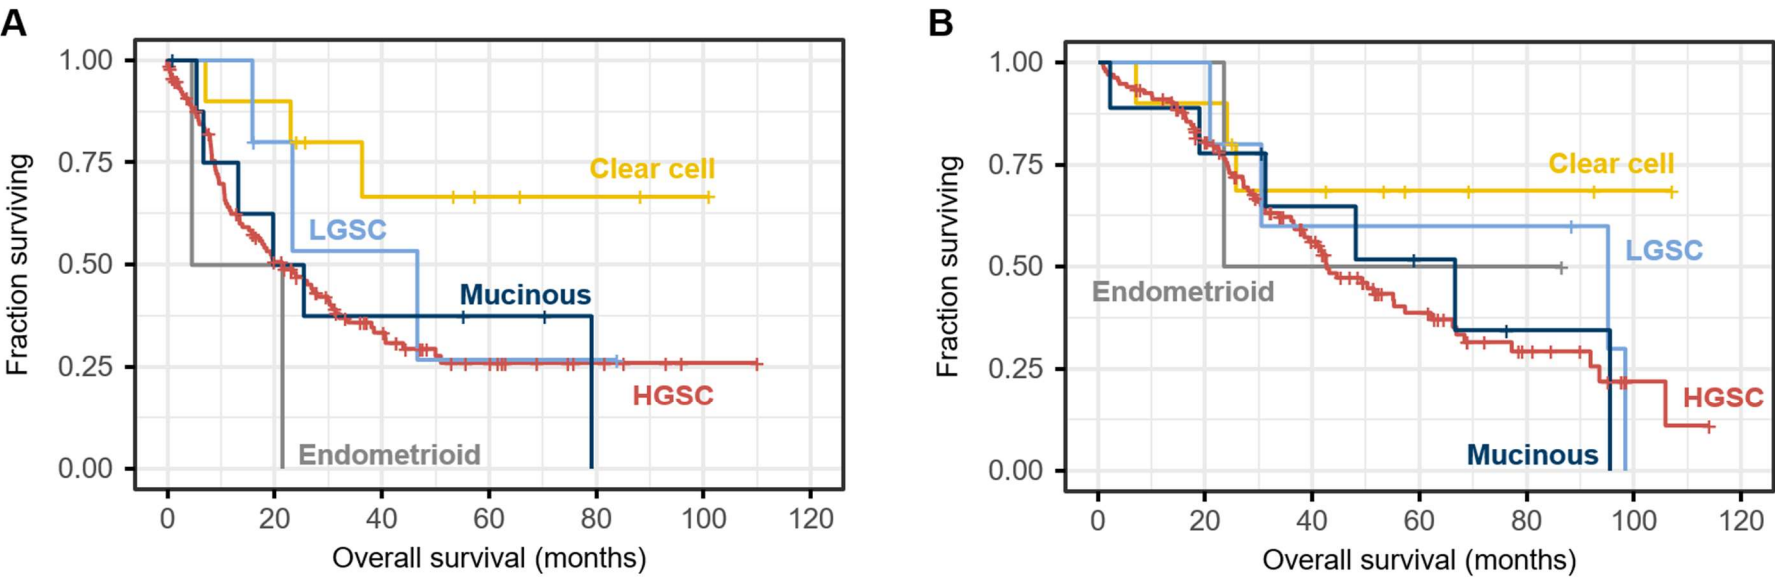

**Figure S6:** Association between *TP53* mutation status and platinum-free interval of nonHGSC EOC patients

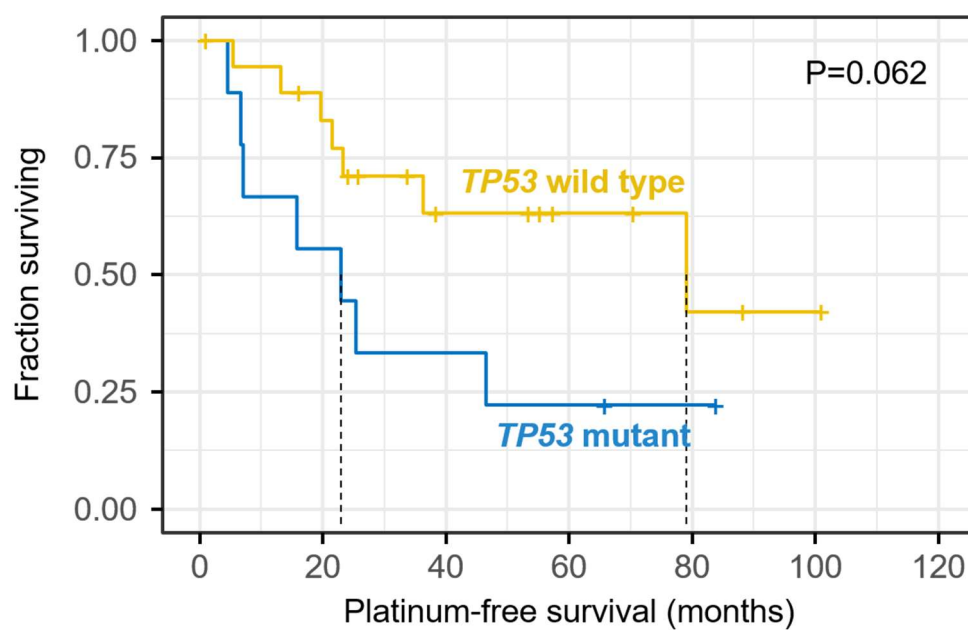

**Table S1:** List of primers used for *KRAS* and *TP53* mutation analysis in EOC patients by direct Sanger sequencing

| Gene | Exon | Sequencing primers (5'→3') |                        |
|------|------|----------------------------|------------------------|
|      |      | Forward                    | Reverse                |
| TP53 |      |                            |                        |
|      | 5    | CACTTGTGCCCTGACTTTCA       | AGAGACGACAGGGCTGGTT    |
|      | 6    | CAGGCCTCTGATTCTCACT        | CTCTGGGAGGAGGGGTTAAG   |
|      | 7    | CCACAGGTCTCCCAAGG          | CTGCACACTGGCCTGCTG     |
|      | 8    | GCCTCTTGCTTCTCTTTCC        | GGAGACCAAGGGTGCAGTTA   |
|      | 9    | AGCACTAAGCGAGGTAAGCA       | CCAGGAGCCATTGTCTTTGA   |
|      | 10   | TGCATGTTGCTTTTGTACCGT      | GGCTGGGACCCAATGAGAT    |
| KRAS |      |                            |                        |
|      | 2    | AAGCGTCGATGGAGGAGTTT       | GAATGGTCCTGCACCAGTAAT  |
|      | 3    | AGGTGCACTGTAATAATCCAGACT   | TGCATGGCATTAGCAAAGACTC |

**Table S2:** Associations between EOC subtype and disease stage

| Characteristics | HGSC subtype* | nonHGSC subtypes* | p-value |
|-----------------|---------------|-------------------|---------|
| Stage I/II      | 13            | 13                | <0.001  |
| Stage III/IV    | 132           | 8                 |         |

Footnotes:

\*Numbers of patients; for some patients clinical data were not available.
